# Supplementary material
Source: PubMed Central journal article supplement (PMC3883620)
Supplement: NIHMS536156-supplement-Supp_Table_S1.pdf [file NIHMS536156-supplement-Supp_Table_S1.pdf]

**Supp. Table S1. Rare, heterozygous, nonsynonymous sequence variants present in all four affected individuals who underwent exome sequencing**

| Chr | Nucleotide (hg19) | Gene Symbol and Accession Number | Variant <sup>a</sup>  | Amino Acid change | Gene Name                                    |
|-----|-------------------|----------------------------------|-----------------------|-------------------|----------------------------------------------|
| 2   | 179440229         | TTN<br>(NM_001267550.1)          | c.70630A>G            | p.I23544V         | Titin                                        |
| 2   | 216279562         | FN1<br>(NM_212482.1)             | c.1939C>T             | p.P647S           | Fibronectin 1                                |
| 7   | 27140773          | HOXA2<br>(NM_006735.3)           | c.703C>T <sup>b</sup> | p.Q235*           | Homeobox A2                                  |
| 11  | 108060036         | NPAT<br>(NM_002519.2)            | c.353C>T              | p.A118V           | Nuclear protein, ataxia-telangiectasia locus |
| 11  | 118958999         | HMBS<br>(NM_000190.3)            | c.68T>C               | p.V23A            | Hydroxymethylbilane synthase                 |
| 17  | 79914802          | NOTUM<br>(NM_178493.5)           | c.844A>G              | p.T282A           | Notum pectinacylesterase homolog             |
| 22  | 24580811          | SUSD2<br>(NM_019601.3)           | c.693_698delTTTCAC    | p.F232_T233del    | Sushi domain containing 2                    |

<sup>a</sup>Nucleotide numbering reflects cDNA numbering with +1 corresponding to the A of the ATG translation initiation codon in the reference sequence

<sup>b</sup>The HOXA2 nonsense variant has been submitted to the LOVD HOX2 locus specific database at <http://www.lovd.nl/HOXA2>
